# Supplementary material
Source: PubMed Central journal article supplement (PMC6906081)
Supplement: NIHMS1061246-supplement-supplemental.pdf [file NIHMS1061246-supplement-supplemental.pdf]

## Supporting Information

### **Towards the non-invasive continuous monitoring of physiological glucose using a novel monosaccharide-sensing contact lens**

Ramachandram Badugu<sup>1</sup>, Joseph R. Lakowicz\*<sup>1</sup> and Chris D. Geddes<sup>1,2\*</sup>

<sup>1</sup>Center for Fluorescence Spectroscopy, Department of Biochemistry and Molecular Biology, Medical Biotechnology Center, University of Maryland School of Medicine, 725 West Lombard St, Baltimore, MD, 21201, USA.

<sup>2</sup>Institute of Fluorescence and Center for Fluorescence Spectroscopy, Medical Biotechnology Center, University of Maryland Biotechnology Institute, 725 West Lombard St, Baltimore, MD, 21201, USA.

\*All correspondence to: [Cfs@cfs.umbi.umd.edu](mailto:Cfs@cfs.umbi.umd.edu)

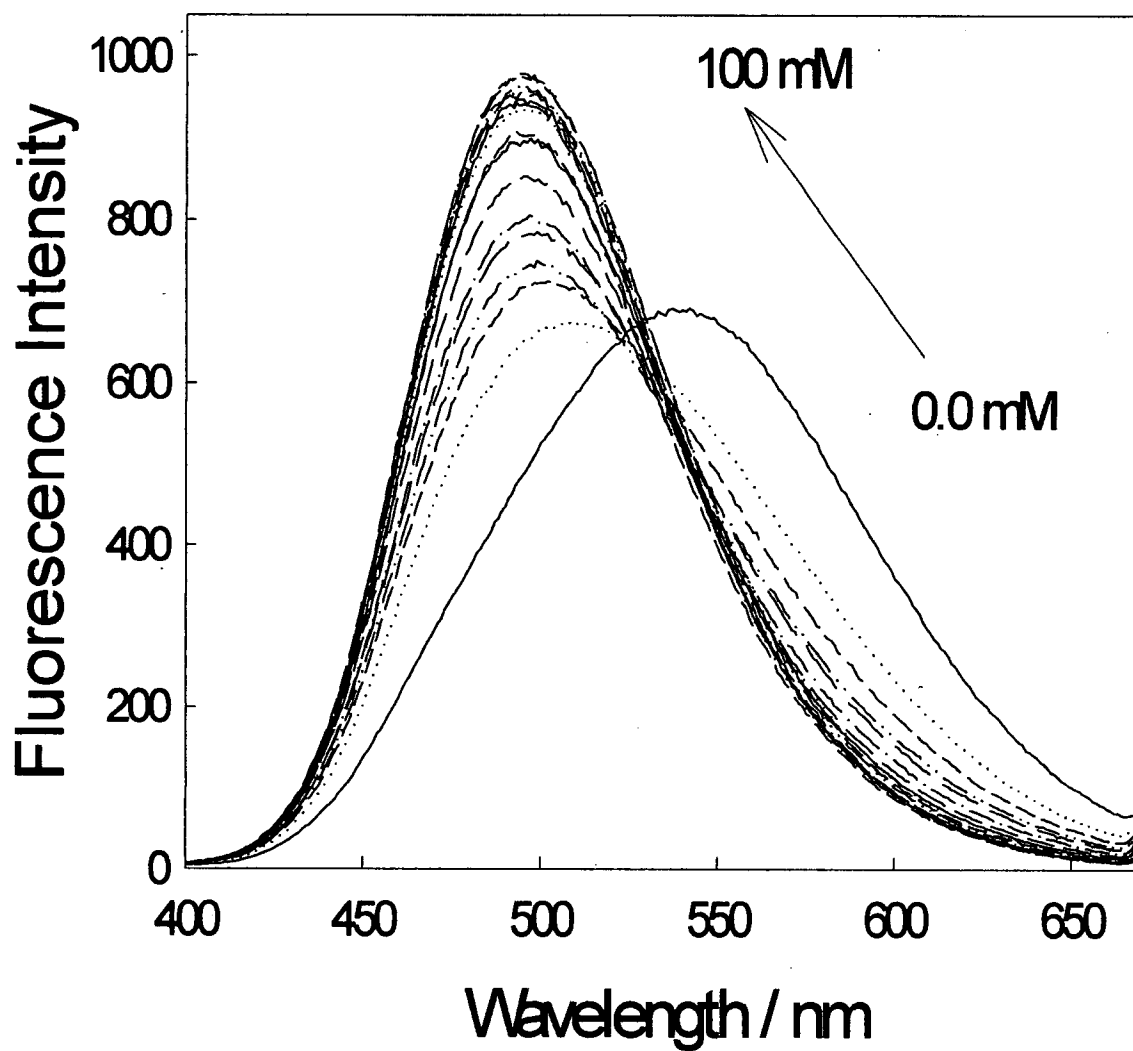

**Figure S1** - Emission spectra of DDPBBA in pH 8.0 buffer / methanol (2:1) with increasing concentrations of fructose,  $\lambda_{\text{ex}} = 340$  nm.

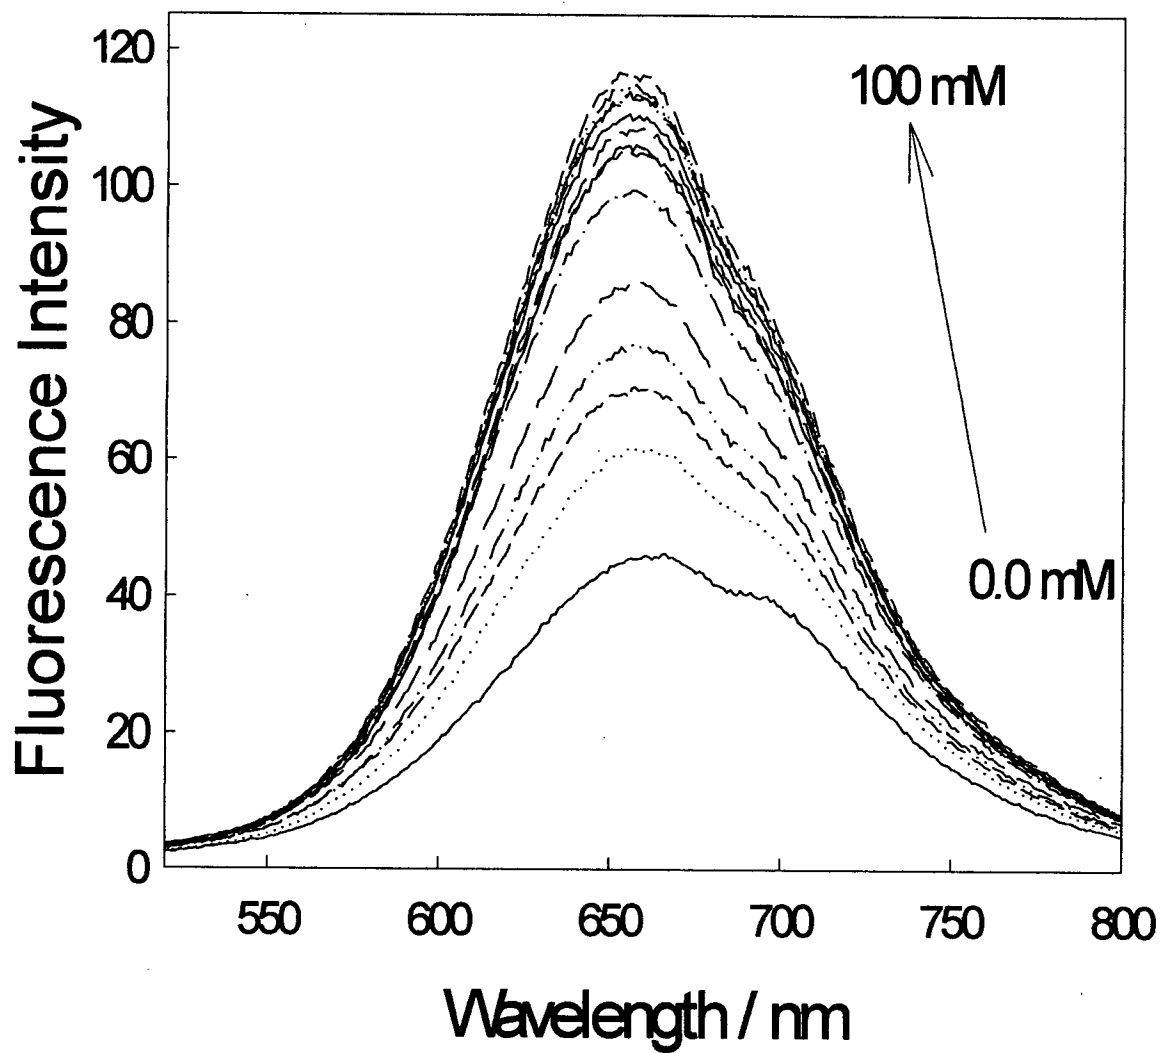

**Figure S2** – Emission spectra of Chalc 2 in pH 8.0 / methanol (2:1) with increasing concentrations of fructose,  $\lambda_{\text{ex}} = 430 \text{ nm}$ .

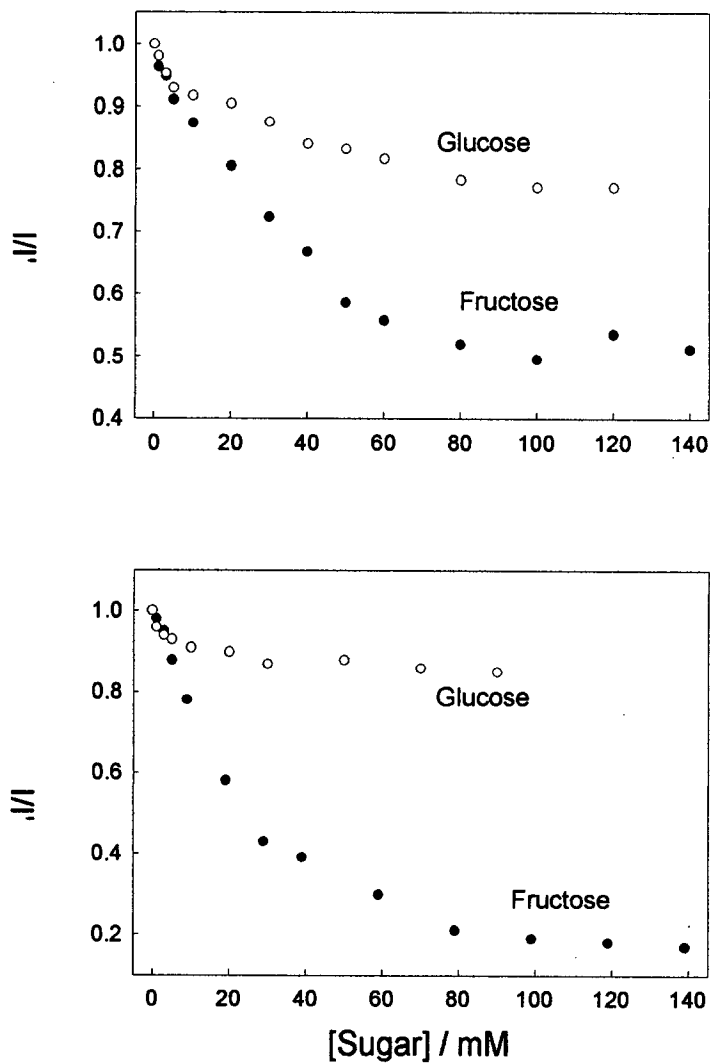

**Figure S3** – Intensity ratio plot for the DSTBA doped contact lens towards both glucose and fructose, where  $I$  and  $I_0$  are the intensities in the presence and absence of sugar respectively,  $\lambda_{em} \max$ , (Top), and the intensity ratio plot for the CSTBA doped contact lens towards both glucose and fructose (Bottom).

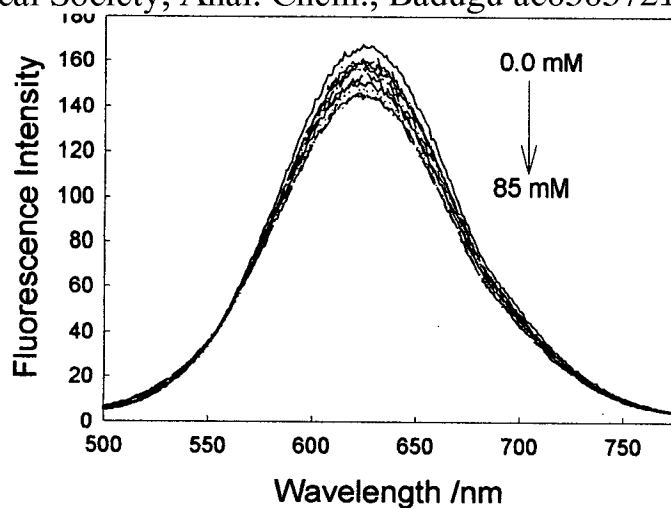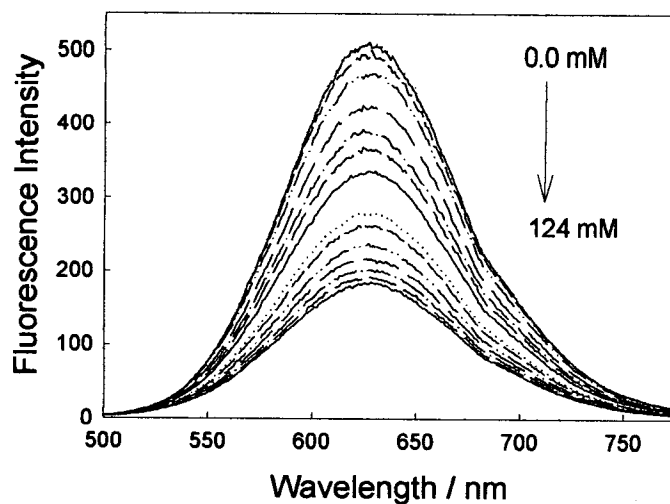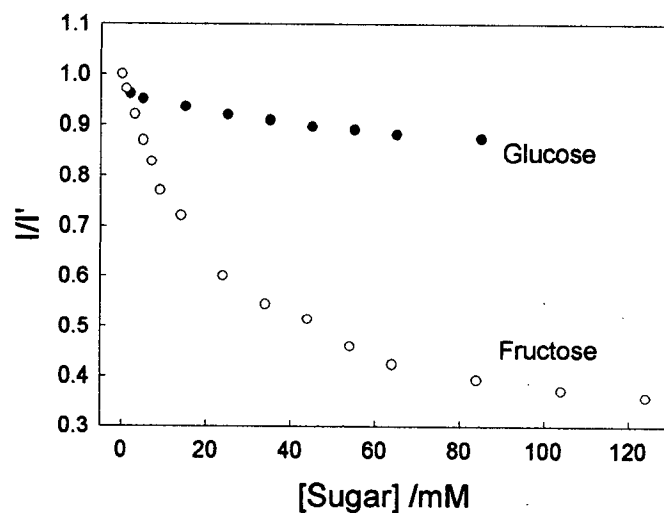

**Figure S4.** - Emission spectra of the Chalc 2 doped contact lens, pH 8.0 buffer / methanol (2:1), with increasing concentrations of glucose,  $\lambda_{ex} = 460$  nm (Top), the emission spectra of the Chalc 2 doped contact lens, pH 8.0 buffer / methanol (2:1), with increasing concentrations of fructose,  $\lambda_{ex} = 460$  nm (Middle) and the intensity ratio plot for the Chalc 2 doped lens towards both glucose and fructose, where  $I$  and  $I_0$  are the intensities in the presence and absence of sugar respectively at  $\lambda_{em}$  max (Bottom).
